# Supplementary material
Source: Springer Nature journal article supplement (https://www.springermedizin.de/resource/supplementary/12874_2011_627_MOESM1_ESM.pdf/9432272)
Supplement: MOESM1 [file 9432272]

**Aim:**

To develop methodological guidance, publication standards and training resources for realist and meta-narrative review.

**Design:**

Mixed-method study comprising:

- Literature review
- Online Delphi panel
- Real-time engagement with teams undertaking reviews

**Method:**

Work package 1:  
Literature review

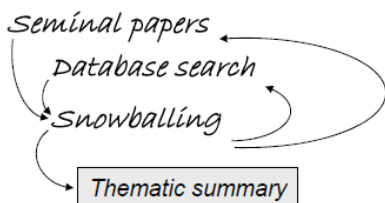

Work package 2:  
Online Delphi  
panel of experts

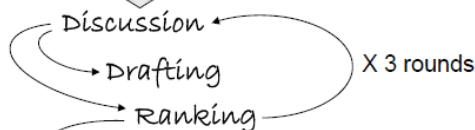

Work package 3:  
Support for  
ongoing reviews

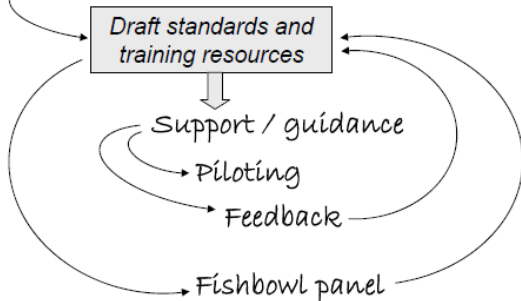

External review

**Outputs:**

1. Quality standards and methodological guidance for researchers, peer reviewers, students and supervisors.
2. 'RAMESES' statement of publication standards.
3. Training resources.
